# Supplementary material for: Interdisziplinäres Positionspapier „Perioperatives Schmerzmanagement“
Source: Springer Nature journal article supplement (doi:10.1007/s00482-017-0217-y), 2017-04-13
Supplement: MOESM1 [file 12223026]

**Tab. 3** Übersicht über die in der perioperativen Schmerztherapie eingesetzten Applikationsverfahren

| Verfahrensgruppe      | Verabreichungsform                                  | Medikamente                                                                                                             | Indikationen bzw. Kontraindikationen                                                                                                                                                                                                                                                                                                                                                                                                                                                                                                                                                                                                        | Kommentar                                                                                                                                                                                                                                                                                                                                                                                                                                                                                                                                                                                                                                                                                                                                                         |
|-----------------------|-----------------------------------------------------|-------------------------------------------------------------------------------------------------------------------------|---------------------------------------------------------------------------------------------------------------------------------------------------------------------------------------------------------------------------------------------------------------------------------------------------------------------------------------------------------------------------------------------------------------------------------------------------------------------------------------------------------------------------------------------------------------------------------------------------------------------------------------------|-------------------------------------------------------------------------------------------------------------------------------------------------------------------------------------------------------------------------------------------------------------------------------------------------------------------------------------------------------------------------------------------------------------------------------------------------------------------------------------------------------------------------------------------------------------------------------------------------------------------------------------------------------------------------------------------------------------------------------------------------------------------|
| Systemische Verfahren | Oral                                                | Nichtopioidanalgetika (Paracetamol, Metamizol, COX-Hemmer)<br>Opioide<br>Gabapentinoide                                 | Die orale Gabe ist gegenüber der i. v.-Anwendung bei Patienten zu bevorzugen, für die sich eine orale Verabreichung eignet. Bei Abdominaleingriffen, Schluckstörungen, einer erforderlichen Nahrungskarenz, Übelkeit oder Erbrechen ist die orale Verabreichung nicht angezeigt. Mit Beginn des postoperativen Kostaufbaus kann auf orale Analgetika umgestellt werden                                                                                                                                                                                                                                                                      | Die geringe Invasivität und einfache Anwendung sind Vorteile der oralen Gabe, ebenso wie die häufig gleich hohe Effektivität wie die i. v.-Verabreichung. Eine Ausnahme bildet Paracetamol, für das eine bessere Effektivität der i. v.-Gabe belegt ist. Nicht angezeigt sind orale Analgetika bei besonders schmerzhaften HNO-Eingriffen. Zu den Nachteilen der oralen Verabreichung gehören die Notwendigkeit des aktiven Schluckens, die lange Anschlagszeit, die unsichere Resorption und die schlechte Steuerbarkeit. Der Umstieg von i. v.- auf orale Verfahren stößt trotz der geringeren Invasivität bei Patienten gelegentlich auf Bedenken, weil die i. v.-Anwendung, wohl wegen des stärkeren Placeboeffekts, mit höherer Effektivität assoziiert wird |
|                       | Rektal                                              | –                                                                                                                       | Eine rektale Analgetikagabe ist im perioperativen Schmerzmanagement nicht zu empfehlen                                                                                                                                                                                                                                                                                                                                                                                                                                                                                                                                                      | –                                                                                                                                                                                                                                                                                                                                                                                                                                                                                                                                                                                                                                                                                                                                                                 |
|                       | i. m.                                               | –                                                                                                                       | Die intramuskuläre Analgetikagabe ist im perioperativen Schmerzmanagement obsolet und zu vermeiden                                                                                                                                                                                                                                                                                                                                                                                                                                                                                                                                          | –                                                                                                                                                                                                                                                                                                                                                                                                                                                                                                                                                                                                                                                                                                                                                                 |
|                       | s. c.                                               | –                                                                                                                       | Die subkutane Analgetikagabe ist im perioperativen Schmerzmanagement obsolet und zu vermeiden                                                                                                                                                                                                                                                                                                                                                                                                                                                                                                                                               | –                                                                                                                                                                                                                                                                                                                                                                                                                                                                                                                                                                                                                                                                                                                                                                 |
|                       | i. v.                                               | Nichtopioidanalgetika (Paracetamol, Metamizol, COX-Hemmer)<br>Opioide<br>NMDA-Rezeptor-Antagonisten<br>Lokalanästhetika | Die intravenöse Analgetikagabe ist bei allen Schmerzen, vor allem bei starken Schmerzen, geeignet. Starke Opioide sollten i. v. nur durch geschultes Personal verabreicht werden, bevorzugt als i. v.-PCA, auf Basis eines spitalsinternen schriftlichen Standards                                                                                                                                                                                                                                                                                                                                                                          | Vorteile der i. v.-Verabreichung sind der schnelle Wirkeintritt und die gute Titrierbarkeit. Zur kontinuierlichen Gabe von schwachen Opioiden (Tramadol, gemeinsam mit Metamizol und DHB im Sinne des „Würzburger Schmerztröpfchs“) gibt es breite klinische Erfahrungen und Studien für die Effektivität bei schwachen und mittelstarken postoperativen Schmerzen. Ein Risiko der i. v.-Gabe besteht in der Gefahr der Überdosierung; bei Opioiden besteht darüber hinaus das Risiko von Sedierung und Atemdepression                                                                                                                                                                                                                                            |
|                       | i. v. PCA/PCIA (Infusionspumpe oder Elastomerpumpe) | Opioide                                                                                                                 | i. v.-PCA oder PCIA sollten zum Einsatz kommen, wenn eine parenterale Verabreichung von Opioiden über längere Zeit als wenige Stunden erforderlich ist. Indiziert sind i. v.-PCA oder PCIA bei großen Eingriffen sowie Patienten mit chronischen Schmerzkrankungen und bei Patienten, bei denen herkömmliche Verfahren auf der Station nicht ausreichen. Nicht geeignet sind i. v.-PCA oder PCIA bei mangelnden persönlichen Fähigkeiten, das PCIA-System zu bedienen, bei sedierten Patienten oder Patienten, die nicht kooperieren, bei akuter hepatischer Porphyrie, bei Allergien gegen Opioide sowie bei respiratorischer Insuffizienz | Wie generell bei PCA-Verfahren ist ein großer Patientennutzen erzielbar: PCIA ermöglicht Patienten eine größere Unabhängigkeit bei der Schmerztherapie und deren Anpassung an ihre Bedürfnisse. Zu den Hürden für die PCIA-Anwendung in der Praxis gehört die Tatsache, dass die Handhabung als schwierig wahrgenommen wird, sowie die Unsicherheit mancher, besonders älterer, Patienten im Handling. Ein Akutschmerzdienst muss vorhanden sein                                                                                                                                                                                                                                                                                                                  |

**Tab. 3** Übersicht über die in der perioperativen Schmerztherapie eingesetzten Applikationsverfahren (Fortsetzung)

| Verfahrensgruppe                | Verabreichungsform                               | Medikamente                                                                                                  | Indikationen bzw. Kontraindikationen                                                                                                                                                                                                                                 | Kommentar                                                                                                                                                                                                                                                                                                                                                                                                                                                                                                                                      |
|---------------------------------|--------------------------------------------------|--------------------------------------------------------------------------------------------------------------|----------------------------------------------------------------------------------------------------------------------------------------------------------------------------------------------------------------------------------------------------------------------|------------------------------------------------------------------------------------------------------------------------------------------------------------------------------------------------------------------------------------------------------------------------------------------------------------------------------------------------------------------------------------------------------------------------------------------------------------------------------------------------------------------------------------------------|
|                                 | Iontophoretisch-transdermale und sublinguale PCA | Opioid (Fentanyl bei der iontophoretisch-transdermalen Anwendung; Sufentanil bei der sublingualen Anwendung) | Die Verfahren sind bei akuten, mäßigen bis starken postoperativen Schmerzen geeignet                                                                                                                                                                                 | Neue, nichtinvasive Methoden der PCA wie die iontophoretisch-transdermale patientenkontrollierte Fentanylgabe und die sublinguale Applikation von Sufentaniltabletten durch ein spezielles patientengesteuertes Applikationsgerät könnten zu einer verstärkten Anwendung der PCA beitragen.<br>Es fehlen allerdings noch klinische Erfahrungen in der breiten Anwendung                                                                                                                                                                        |
| <i>Lokal-/Regionalverfahren</i> | Wundinfiltration                                 | Lokalanästhetika                                                                                             | Bei einigen Eingriffen gibt es Hinweise auf eine gute analgetische Effektivität von Wundinfiltrationen bei prä- oder intraoperativer Anwendung.<br>Diese Methode kann insbesondere bei laparoskopischen Eingriffen in Betracht gezogen werden                        | Im Sinne einer präemptiven Schmerztherapie kann auch eine präoperative Anwendung an der Operationsstelle vor der ersten Inzision erfolgen, um eine stärkere Hemmung der Nozizeption zu erreichen und den entzündungshemmenden Nutzen der Lokalanästhetika noch besser zur Geltung kommen zu lassen. Eine Einsparung postoperativ erforderlicher Analgetika ist möglich                                                                                                                                                                         |
|                                 | Kontinuierliche Wundinfiltration                 | Lokalanästhetika                                                                                             | Kontinuierliche Wundinfiltrationen können für jene Eingriffe in Betracht gezogen werden, für die eine Wirksamkeit hinsichtlich der perioperativen Analgesie belegt ist, zum Beispiel Abdominaleingriffe sowie Hüft-, Knie- und Schulteroperationen                   | Diese Option kann Vorteile gegenüber der Frühmobilisierung bieten. Häufig ist eine Einsparung von Opioiden möglich                                                                                                                                                                                                                                                                                                                                                                                                                             |
|                                 | Periphere Nervenblockaden                        | Lokalanästhetika                                                                                             | Periphere Nervenblockaden sollten für die Therapie starker postoperativer Schmerzen bei Eingriffen in Betracht gezogen werden, für die eine Wirksamkeit belegt ist. Das gilt zum Beispiel für die Thorakotomie und die Chirurgie der oberen und unteren Extremitäten | Zu den Vorteilen peripherer Nervenblockaden gehören die lang anhaltende, kontinuierliche Wirkung, die individuell festlegbare Dauer, die geringe Komplikationsrate sowie die Möglichkeit einer guten Mobilisation.<br>Das Verfahren ist invasiv und technisch aufwendig, es besteht ein Infektions- und Blutungsrisiko.<br>Bei kontinuierlichen Verfahren muss ein Akutschmerzdienst verfügbar sein, ein angemessenes kontinuierliches Monitoring zur rechtzeitigen Erkennung von Komplikationen ist erforderlich.<br>Cave: Kompartmentsyndrom |

**Tab. 3** Übersicht über die in der perioperativen Schmerztherapie eingesetzten Applikationsverfahren (Fortsetzung)

| Verfahrensgruppe | Verabreichungsform                             | Medikamente                                   | Indikationen bzw. Kontraindikationen                                                                                                                                                                                                                                                                                                                                                                                                                                                  | Kommentar                                                                                                                                                                                                                                                                                                                                                                                                                                                                                                                                                                                                                                                                                                                                                                                                                                                                                                                                                                                                                                                                                                            |
|------------------|------------------------------------------------|-----------------------------------------------|---------------------------------------------------------------------------------------------------------------------------------------------------------------------------------------------------------------------------------------------------------------------------------------------------------------------------------------------------------------------------------------------------------------------------------------------------------------------------------------|----------------------------------------------------------------------------------------------------------------------------------------------------------------------------------------------------------------------------------------------------------------------------------------------------------------------------------------------------------------------------------------------------------------------------------------------------------------------------------------------------------------------------------------------------------------------------------------------------------------------------------------------------------------------------------------------------------------------------------------------------------------------------------------------------------------------------------------------------------------------------------------------------------------------------------------------------------------------------------------------------------------------------------------------------------------------------------------------------------------------|
|                  | Rückenmarksnahe Blockaden                      | Lokalanästhetika                              | Rückenmarksnahe Blockaden sind bei ausgedehnten Thorax- und Abdominaleingriffen, Sectio und anderen gynäkologischen Eingriffen, urologischen Eingriffen sowie Operationen der unteren Extremitäten besonders geeignet.<br>Zu den Kontraindikationen gehören Infektionen im Bereich der Einstichstelle, bestehender Volumenmangel, systemische Infektionen, manifeste Gerinnungsstörungen, eine antikoagulierende Therapie, unklare neurologische Ausfälle sowie anatomische Anomalien | Vorteile der rückenmarksnahen Blockaden sind die hohe analgetische Effektivität sowie die lang anhaltende kontinuierliche Wirkung.<br>Das Verfahren ist invasiv und technisch aufwendig, es besteht ein Infektions- und Blutungsrisiko.<br>Bei kontinuierlichen Verfahren muss ein Akutschmerzdienst verfügbar sein, ein angemessenes kontinuierliches Monitoring zur rechtzeitigen Erkennung von Komplikationen ist erforderlich.<br>Bis 24 h nach Entfernung des Katheters muss kontrolliert werden, ob sich neurologische Defizite zurückgebildet haben oder ob Blutungen oder Abszesse entstanden sind.<br>Mehrere Cochrane Reviews zeigen, dass epidurale Analgesie zu einer besseren Schmerzlinderung führt als die parenterale Verabreichung von Opioiden, einschließlich in Form von patientenkontrollierter Analgesie (PCA), insbesondere bei offener Chirurgie ist die epidurale Analgesie überlegen. Andere Arbeiten wiederum zeigen eine Überlegenheit der PCA gegenüber der epiduralen Analgesie im Rahmen von Fast-Track-Konzepten bei großen laparoskopischen Eingriffen.<br>Cave: Kompartmentsyndrom |
|                  | Patienten-gesteuerte Epiduralanästhesie (PCEA) | Lokalanästhetika (mit oder ohne Opioidzusatz) | Geeignet ist die PCEA unter anderem bei größeren abdominalen und Thoraxeingriffen.<br>Nicht geeignet ist das Verfahren bei akuten Blutungen, bei gerinnungshemmender Medikation, bei unkorrigierter Hypovolämie bei Infektionen im Punktionsgebiet, Allergien und Hirndruck                                                                                                                                                                                                           | Mit PCEA ist eine gute Analgesie unter Belastungsbedingungen möglich, Vorteile sind die geringe Sedierung, die gute Erholung der Lungenfunktion, die geringe kardiovaskuläre Aktivierung sowie eine Verbesserung der GI-Durchblutung und -Mobilität.<br>Bei sorgfältiger Durchführung und Überwachung stellt die PCEA ein sicheres Verfahren dar, ein angemessenes kontinuierliches Monitoring ist erforderlich.<br>Gewisse organisatorische Voraussetzungen wie die Verfügbarkeit eines Akutschmerzdienstes müssen erfüllt sein, auch ein Komplikationsmanagement muss vorhanden sein                                                                                                                                                                                                                                                                                                                                                                                                                                                                                                                               |
