# Supplementary material for: Interdisziplinäres Positionspapier „Perioperatives Schmerzmanagement“
Source: Springer Nature journal article supplement (doi:10.1007/s00482-017-0217-y), 2017-04-13
Supplement: MOESM2 [file 12223026]

**Tab. 4** Übersicht über die in der perioperativen Schmerztherapie eingesetzten Substanzen

| Substanzgruppe                                   | Vertreter der Substanzgruppe                                                                      | Verfügbare Darreichungsformen | Kommentar                                                                                                                                                                                                                                                                                                                                                                                                                                                                                                                                                                                                                                                                                                                                                                                                                                                                                                                  | Geeignete Kombinationen                                                                                                                                                                                                                                                                                                                                                                                                                                                                                                                                                                                                                                                                |
|--------------------------------------------------|---------------------------------------------------------------------------------------------------|-------------------------------|----------------------------------------------------------------------------------------------------------------------------------------------------------------------------------------------------------------------------------------------------------------------------------------------------------------------------------------------------------------------------------------------------------------------------------------------------------------------------------------------------------------------------------------------------------------------------------------------------------------------------------------------------------------------------------------------------------------------------------------------------------------------------------------------------------------------------------------------------------------------------------------------------------------------------|----------------------------------------------------------------------------------------------------------------------------------------------------------------------------------------------------------------------------------------------------------------------------------------------------------------------------------------------------------------------------------------------------------------------------------------------------------------------------------------------------------------------------------------------------------------------------------------------------------------------------------------------------------------------------------------|
| <b>Nichtopioide</b>                              |                                                                                                   |                               |                                                                                                                                                                                                                                                                                                                                                                                                                                                                                                                                                                                                                                                                                                                                                                                                                                                                                                                            |                                                                                                                                                                                                                                                                                                                                                                                                                                                                                                                                                                                                                                                                                        |
| <i>Anilinderivate</i>                            | Paracetamol                                                                                       | Oral<br>i. v.                 | Paracetamol, ein Nichtopioidanalgetikum mit einem günstigen Risiko-Nutzen-Profil, wirkt moderat bis gut schmerzstillend und fiebersenkend und findet Anwendung als Teil einer multimodalen postoperativen Schmerztherapie.<br>In normaler Dosierung und fallweise verabreicht ist Paracetamol sehr gut verträglich, es wurde klinisch keine negative Beeinflussung der Niere oder der Blutgerinnung beobachtet. Überdosierungen von >4 g/d können zu potenziell letalen Leberschäden führen.<br>Ein Cochrane Review zeigt für Paracetamol i. v. deutlich bessere Effektivität als für Paracetamol oral                                                                                                                                                                                                                                                                                                                     | Paracetamol wird in der Regel perioperativ nicht als Monotherapie eingesetzt, sondern als Teil eines multimodalen Schmerzmanagements, wenn keine Kontraindikationen vorliegen.<br>Die Kombination von postoperativen Opioiden mit Paracetamol ermöglicht eine verbesserte Analgesie, möglicherweise auch eine Reduktion der Opioiddosierung.<br>Die Kombination von NSAR mit Paracetamol verbessert den analgetischen Effekt gegenüber der jeweiligen Monotherapie.<br>Paracetamol wirkt antihyperanalgetisch.<br>Die Wirkung von Paracetamol wird durch 5HT3-Antagonisten abgeschwächt bis aufgehoben.<br>Paracetamol sollte nicht mit Metamizol kombiniert werden                    |
| <i>Pyrazolonderivate</i>                         | Metamizol                                                                                         | Oral<br>i. v.                 | Metamizol wirkt analgetisch, antipyretisch, spasmolytisch und schwach antiphlogistisch.<br>Die Substanz kann bei Niereninsuffizienz verabreicht werden, eine Dosisreduktion ist aber erforderlich.<br>In sehr seltenen Fällen kann Metamizol zu Agranulozytose führen.<br>Metamizol ist kontraindiziert bei Erkrankungen des hämatopoetischen Systems und bestehender Leukopenie (Ausnahme: Leukopenie im Rahmen einer Chemotherapie).<br>Cave: Hypotonus und Knochenmarkdepression                                                                                                                                                                                                                                                                                                                                                                                                                                        | Metamizol wird in der Regel perioperativ nicht als Monotherapie eingesetzt, sondern als gut verträglicher Teil eines multimodalen Schmerzmanagements.<br>Die Kombination von postoperativen Opioiden mit Metamizol ermöglicht eine verbesserte Analgesie und eine Reduktion des Opioidbedarfs.<br>Metamizol und Paracetamol sollten nicht kombiniert werden, eine Kombination mit NSAR ist möglich.<br>Der Einfluss von Metamizol auf die Gerinnung ist nur kurzfristig                                                                                                                                                                                                                |
| <b>Cyclooxygenasehemmer</b>                      |                                                                                                   |                               |                                                                                                                                                                                                                                                                                                                                                                                                                                                                                                                                                                                                                                                                                                                                                                                                                                                                                                                            |                                                                                                                                                                                                                                                                                                                                                                                                                                                                                                                                                                                                                                                                                        |
| <i>Unspezifische Cyclooxygenasehemmer – NSAR</i> | Diclofenac<br>Ibuprofen<br>Dexibuprofen<br>Naproxen<br>Ketoprofen<br>Mefenaminsäure<br>Lornoxicam | Oral<br>i. v.                 | NSAR sind analgetisch, antipyretisch und antiphlogistisch wirksam, allein können sie in vielen Fällen keine ausreichende postoperative Analgesie gewährleisten.<br>Schädigungen im Magen-Darm-Trakt (Blutungen, Erosionen, Ulzera) und Schädigungen der Nieren (Cave Hypovolämie) sind ebenso möglich wie kardiovaskuläre Nebenwirkungen.<br>Die kurzfristige Anwendung von NSAR im Rahmen der perioperativen Schmerztherapie ist in der Regel unbedenklich, trotzdem sollten mögliche Nebenwirkungen auf Gastrointestinaltrakt, Nierenfunktion und Blutgerinnung beachtet und ein Einsatz immer im Rahmen des individuellen Nutzen-Risiken-Verhältnisses abgewogen werden.<br>Bei kardiovaskulären Erkrankungen und im Rahmen von Bypass-Operationen sind NSAR kontraindiziert. Es gibt Berichte über eine verminderte Knochen- und Wundheilung unter hoch dosierten NSAR sowie Anastomoseninsuffizienz bei Darmoperation | NSAR werden in der Regel perioperativ nicht als Monotherapie eingesetzt, sondern sollten Teil eines multimodalen Schmerzmanagements sein, wenn keine Kontraindikationen vorliegen.<br>Die postoperative Kombination von Opioiden mit NSAR ermöglicht eine verbesserte Analgesie, eine Reduktion des Opioidbedarfs bzw. eine Verminderung unerwünschter dosisabhängiger Wirkungen in den unterschiedlichen Substanzgruppen, die Teil der Kombination sind.<br>Die Kombination von NSAR mit Paracetamol oder mit Metamizol verbessert den analgetischen Effekt gegenüber der jeweiligen Monotherapie.<br>Die Kombination von verschiedenen Cyclooxygenasehemmern sollte vermieden werden |

**Tab. 4** Übersicht über die in der perioperativen Schmerztherapie eingesetzten Substanzen (Fortsetzung)

| Substanzgruppe                  | Vertreter der Substanzgruppe                           | Verfügbare Darreichungsformen | Kommentar                                                                                                                                                                                                                                                                                                                                                                                                                                                                                                                                                                                                                                                                                                                                                                                       | Geeignete Kombinationen                                                                                                                                                                                                                                                                                                                                                                                            |
|---------------------------------|--------------------------------------------------------|-------------------------------|-------------------------------------------------------------------------------------------------------------------------------------------------------------------------------------------------------------------------------------------------------------------------------------------------------------------------------------------------------------------------------------------------------------------------------------------------------------------------------------------------------------------------------------------------------------------------------------------------------------------------------------------------------------------------------------------------------------------------------------------------------------------------------------------------|--------------------------------------------------------------------------------------------------------------------------------------------------------------------------------------------------------------------------------------------------------------------------------------------------------------------------------------------------------------------------------------------------------------------|
| <i>NSAR-Fixkombinationen</i>    | Diclofenac-Orphenadrin                                 | i. v.                         | Zusätzlich zur Wirkung des NSAR entwickelt in dieser häufig eingesetzten Fixkombination Orphenadrin eine zentral analgetische und antihyperalgetische Wirkung. Wichtige Anwendungsgebiete sind postoperative Schmerzen nach spinalen Wirbelsäuleneingriffen mit radikulären Schmerzen, orthopädische und unfallchirurgische Eingriffe sowie urologische Eingriffe mit krampfartigen Schmerzen                                                                                                                                                                                                                                                                                                                                                                                                   | Die Fixkombination Diclofenac-Orphenadrin kann mit Metamizol oder Paracetamol kombiniert werden. Die postoperative Kombination mit Opioiden ermöglicht eine verbesserte Analgesie, eine Reduktion des Opioidbedarfs bzw. eine Verminderung unerwünschter dosisabhängiger Wirkungen in den unterschiedlichen Substanzgruppen, die Teil der Kombination sind                                                         |
| <i>Spezifische COX-2-Hemmer</i> | Celecoxib p. o.<br>Parecoxib i. v.<br>Etoricoxib p. o. | Oral<br>i. v.                 | COX-2-Hemmer sind analgetisch, antipyretisch und antiphlogistisch wirksam. Insbesondere bei großen Eingriffen kann eine präoperative Anwendung erwogen werden, wenn keine Kontraindikationen vorliegen, gefolgt von einem postoperativen Einsatz. Das gastrointestinale Sicherheitsprofil ist im Vergleich zu den konventionellen NSAR sehr hoch, bei floriden gastrointestinalen Ulzera ist die Gabe von Coxiben aber kontraindiziert. Die Plättchenaggregation wird nicht beeinflusst. Der Einsatz von Coxiben kann zur Verschlechterung der Nierenfunktion führen (Cave Hypovolämie). Coxibe sind generell kontraindiziert bei Patienten bei Bypass-Operation sowie bei kardiovaskulären Erkrankungen. Mit Ausnahme von Etoricoxib dürfen sie nicht bei Sulfonamidallergie eingesetzt werden | COX-2-Hemmer werden in der Regel perioperativ nicht als Monotherapie eingesetzt, sondern als Teil eines multimodalen Schmerzmanagements, wenn keine Kontraindikationen vorliegen. Die postoperative Kombination von Opioiden mit COX-2-Hemmern ermöglicht eine verbesserte Analgesie, und häufig eine Reduktion des Opioidbedarfs. Die Kombination von verschiedenen Cyclooxygenasehemmern sollte vermieden werden |
| <b>Opioide</b>                  |                                                        |                               |                                                                                                                                                                                                                                                                                                                                                                                                                                                                                                                                                                                                                                                                                                                                                                                                 |                                                                                                                                                                                                                                                                                                                                                                                                                    |
| <i>Schwach wirksame Opioide</i> | Tramadol                                               | Oral<br>i. v.                 | Die alleinige postoperative Gabe schwach wirksamer Opioide wie Tramadol ist meist für eine zufriedenstellende Schmerzlinderung unzureichend. Die im Vergleich zu stark wirksamen Opioiden geringe analgetische Potenz lässt sich auch nicht durch Dosissteigerung kompensieren. Zu den Nebenwirkungen gehört Emesis am Beginn der Therapie, andere Nebenwirkungen können Schwitzen, Schwindel, Mundtrockenheit, Müdigkeit und Benommenheit sein. Bei höhergradigen Leber- und Nierenfunktionsstörungen muss vorsichtig dosiert werden                                                                                                                                                                                                                                                           | Angesichts der fehlenden entzündungshemmenden Wirkung kann eine Kombination mit antientzündlich wirkenden Analgetika zweckmäßig sein. Die Kombination mit einem Antiemetikum ist angezeigt                                                                                                                                                                                                                         |

**Tab. 4** Übersicht über die in der perioperativen Schmerztherapie eingesetzten Substanzen (Fortsetzung)

| Substanzgruppe                | Vertreter der Substanzgruppe                                                                                               | Verfügbare Darreichungsformen                                                                             | Kommentar                                                                                                                                                                                                                                                                                                                                                                                                                                                                                                                                                                                                                                                                                                                                                                                                                                                                                                                                                                                                                                                                                                                                                                                                                                                                                                                                                                                                                                                                                                   | Geeignete Kombinationen                                                                                                                                                                                                                                                                                                                                                            |
|-------------------------------|----------------------------------------------------------------------------------------------------------------------------|-----------------------------------------------------------------------------------------------------------|-------------------------------------------------------------------------------------------------------------------------------------------------------------------------------------------------------------------------------------------------------------------------------------------------------------------------------------------------------------------------------------------------------------------------------------------------------------------------------------------------------------------------------------------------------------------------------------------------------------------------------------------------------------------------------------------------------------------------------------------------------------------------------------------------------------------------------------------------------------------------------------------------------------------------------------------------------------------------------------------------------------------------------------------------------------------------------------------------------------------------------------------------------------------------------------------------------------------------------------------------------------------------------------------------------------------------------------------------------------------------------------------------------------------------------------------------------------------------------------------------------------|------------------------------------------------------------------------------------------------------------------------------------------------------------------------------------------------------------------------------------------------------------------------------------------------------------------------------------------------------------------------------------|
| <i>Stark wirksame Opioide</i> | Piritramid<br>Morphin Hydromorphon<br>Oxycodon<br>Oxycodon/Naloxon<br>Fentanyl<br>Remifentanyl<br>Sufentanyl<br>Tapentadol | Oral<br>i. v.<br>PCA<br>Transdermal-<br>iontophoretisch:<br>nur Fentanyl<br>Sublingual: nur<br>Sufentanyl | <p>Stark wirksame Opioide entfalten eine starke schmerzlindernde Wirkung im Rahmen des perioperativen Schmerzmanagements. Allerdings ist diese mit Nebenwirkungen wie Übelkeit und Erbrechen, Obstipation, Harnverhalten, Juckreiz oder Sedierung sowie einer möglichen Atemdepression bei Überdosierung verbunden.</p> <p>In der Akutschmerzanwendung zeigt keines der verfügbaren stark wirksamen Opioide Überlegenheit gegenüber den anderen; individuell ist eine unterschiedliche Wirksamkeit möglich. Bei PCIA sollte keine Basalrate (Dauerinfusion) verabreicht werden, mit Ausnahmen, die mit dem Schmerzdienst abzusprechen sind.</p> <p>Retardformen sind in der unmittelbaren postoperativen Phase für opioidnaive Patienten generell nicht empfehlenswert. Opioide sind auch bei Patienten mit schwerer Leberinsuffizienz einsetzbar, eine sorgfältige Dosis titrierung ist bei diesen Patienten zu empfehlen.</p> <p>Hydromorphon bildet, anders als Morphin, keine Metaboliten, die akkumulieren und pharmakologisch aktiv sind. Im Vergleich zu anderen Opioiden ist Hydromorphon, ebenso wie Buprenorphin und Piritramid, sehr gut für die Analgesie von Patienten mit Niereninsuffizienz geeignet.</p> <p>Bezüglich der analgetischen Wirkung von Oxycodon/Naloxon im postoperativen Einsatz ist die Datenlage noch uneinheitlich, die Tendenz geht in Richtung eines Benefits in Bezug auf die Nebenwirkungen (Obstipation), nicht jedoch hinsichtlich der analgetischen Wirksamkeit</p> | <p>Im Rahmen eines multimodalen Therapiekonzepts ist eine Kombination aus Opioiden und Nichtopioidanalgetika zweckmäßig, da dadurch synergetische analgetische Effekte erzielt werden können und eine Einsparung der Opioiddosierung und eine Reduktion dosisabhängiger Nebenwirkungen aller eingesetzten Substanzgruppen möglich ist</p>                                          |
| <b>Adjuvantien</b>            |                                                                                                                            |                                                                                                           |                                                                                                                                                                                                                                                                                                                                                                                                                                                                                                                                                                                                                                                                                                                                                                                                                                                                                                                                                                                                                                                                                                                                                                                                                                                                                                                                                                                                                                                                                                             |                                                                                                                                                                                                                                                                                                                                                                                    |
| <i>Gabapentinoide</i>         | Gabapentin<br>Pregabalin                                                                                                   | Oral                                                                                                      | <p>Der Einsatz von Gabapentinoide im Rahmen eines multimodalen perioperativen Schmerzmanagements sollte erwogen werden, insbesondere bei großen Eingriffen bereits präoperativ, wenn keine Kontraindikationen vorliegen.</p> <p>Substanzspezifisch hat eine Dosisreduktion bei Nierenfunktionsstörungen zu erfolgen.</p> <p>Schwindel und Sedierung sind mögliche Nebenwirkungen, die die postoperative Mobilisierung beeinträchtigen können.</p> <p>Für einige Indikationen ist nachgewiesen, dass durch Gabapentinoide chronischen postoperativen Schmerzen vorgebeugt werden kann</p>                                                                                                                                                                                                                                                                                                                                                                                                                                                                                                                                                                                                                                                                                                                                                                                                                                                                                                                    | <p>Im Rahmen eines multimodalen perioperativen Schmerztherapiekonzepts ist eine Kombination von Gabapentinoide mit Opioiden und Nichtopioidanalgetika zweckmäßig, da dadurch synergetische analgetische Effekte erzielt werden können und eine Einsparung der Opioiddosierung und eine Reduktion dosisabhängiger Nebenwirkungen aller eingesetzten Substanzgruppen möglich ist</p> |

**Tab. 4** Übersicht über die in der perioperativen Schmerztherapie eingesetzten Substanzen (Fortsetzung)

| Substanzgruppe                    | Vertreter der Substanzgruppe                                   | Verfügbare Darreichungsformen | Kommentar                                                                                                                                                                                                                                                                                                                                                                                                                                                                                | Geeignete Kombinationen                                                                                                                                                                                                                                                                            |
|-----------------------------------|----------------------------------------------------------------|-------------------------------|------------------------------------------------------------------------------------------------------------------------------------------------------------------------------------------------------------------------------------------------------------------------------------------------------------------------------------------------------------------------------------------------------------------------------------------------------------------------------------------|----------------------------------------------------------------------------------------------------------------------------------------------------------------------------------------------------------------------------------------------------------------------------------------------------|
| <i>NMDA-Rezeptor-Antagonisten</i> | Ketamin<br>S(+)-Ketamin                                        | i. v.                         | Perioperativ eingesetztes Ketamin reduziert wirksam postoperativen Schmerz und ist eine gute Option bei starken postoperativen Schmerzen, die schlecht auf Opioide ansprechen. Zu möglichen unerwünschten Wirkungen gehört dosisabhängig ein erhöhtes Risiko für Halluzinationen oder Alpträume. Der i. v.-Einsatz im Rahmen eines multimodalen perioperativen Schmerzmanagements sollte vor allem bei großen Eingriffen erwogen werden. Anwender sollten mit der Substanz vertraut sein | Ketamin sollte bei großen Eingriffen als Teil eines multimodalen perioperativen Schmerzmanagements zum Einsatz kommen, wenn keine Kontraindikationen vorliegen. Die Kombination von postoperativen Opioiden mit Ketamin ermöglicht eine verbesserte Analgesie und eine Reduktion des Opioidbedarfs |
| <i>Lokalanästhetika</i>           | Lidocain<br>Ropivacain<br>Bupivacain<br>Mepivacain<br>Lidocain | i. v.<br>Wundinfiltration     | Die i. v.-Gabe von Lidocain ist ein „off label use“, ist jedoch durch zahlreiche Studien belegt. Indikationen sind große abdominelle und/oder thorakale Operationen, bei welchen eine PDA nicht gelegt werden kann. Die i. v.-Anwendung setzt allerdings voraus, dass die Anwender mit dem Handling vertraut sind.<br>Cave: Intoxikation möglich.<br>Lokalanästhetika stellen eine gute Option für therapierefraktäre postoperative Schmerzen dar                                        | Positive Erfahrungen gibt es bei einigen Eingriffen mit präemptiver Analgesie durch Lokalanästhetika zur Prävention postoperativer Schmerzen.<br>Der i. v.-Einsatz von Lokalanästhetika erfordert ein kontinuierliches Monitoring                                                                  |
